# Supplementary material for: PNIPAM-MAPOSS Hybrid Hydrogels with Excellent Swelling Behavior and Enhanced Mechanical Performance: Preparation and Drug Release of 5-Fluorouracil
Source: MDPI journal article supplement (doi:10.3390/polym10020137), 2018-01-31
Supplement: s1 [file s1]

# PNIPAM-MAPOSS Hybrid Hydrogels with Excellent Swelling Behavior and Enhanced Mechanical Performance: Preparation and Drug Release of 5-Fluorouracil

Peihong Li, Xiaoman Hou, Lijie Qu, Xueyan Dai and Chunling Zhang \*

In the SEM image, the pore size was measured manually. The pore size distribution of gels was shown in Figure S1.

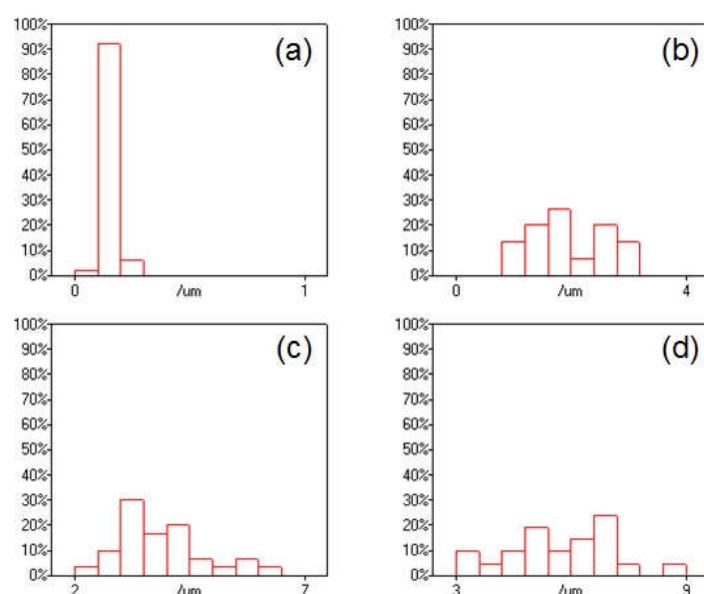

**Figure S1.** The pore size distribution of PNIPAM-MAPOSS hybrid hydrogels: (a) Gel 6, (b) Gel 7, (c) Gel 3, (d) Gel 8.

The release behaviors of the 5-FU loaded NIPAM-MAPOSS hydrogels in PBS (pH 7.4) were evaluated at 37 °C. The cumulative release percentage of Gel 1, Gel 3, Gel 5, Gel 6 and Gel 8 over a period of 9 hours was listed in Table S1.

**Table S1.** The cumulative release percentage (%) of Gel 1, Gel 3, Gel 5, Gel 6 and Gel 8.

| Time (h) | Gel 1 | Gel 3 | Gel 5 | Gel 6 | Gel 8 |
|----------|-------|-------|-------|-------|-------|
| 0.25     | 45.56 | 35.81 | 27.35 | 17.66 | 55.43 |
| 0.5      | 55.47 | 44.72 | 35.66 | 22.91 | 63.38 |
| 1        | 58.08 | 48.84 | 39.47 | 30.79 | 68.90 |
| 2        | 67.01 | 55.56 | 46.03 | 36.28 | 76.51 |
| 3        | 69.63 | 61.29 | 48.92 | 40.30 | 76.81 |
| 4        | 70.50 | 64.94 | 51.77 | 41.58 | 78.58 |
| 5        | 71.15 | 67.77 | 53.28 | 43.21 | 79.25 |
| 7        | 73.50 | 69.84 | 54.87 | 47.34 | 79.71 |
| 9        | 74.23 | 70.92 | 55.15 | 49.15 | 80.44 |
